# Supplementary material for: Comparative Analysis of Response to Cardiac Resynchronisation Therapy Upgrades in Patients with Implantable Cardioverter-Defibrillators and Pacemakers
Source: MDPI journal article supplement (doi:10.3390/jcm13102755), 2024-05-07
Supplement: s1 [file s1]

## Supplementary Appendix.

1. Supplementary Figure 1. Consort Diagram – page 1
2. Baseline and post upgrade characteristics- Page 2
3. Components of the study outcome – page 3

Figure S1. Flow chart diagram.

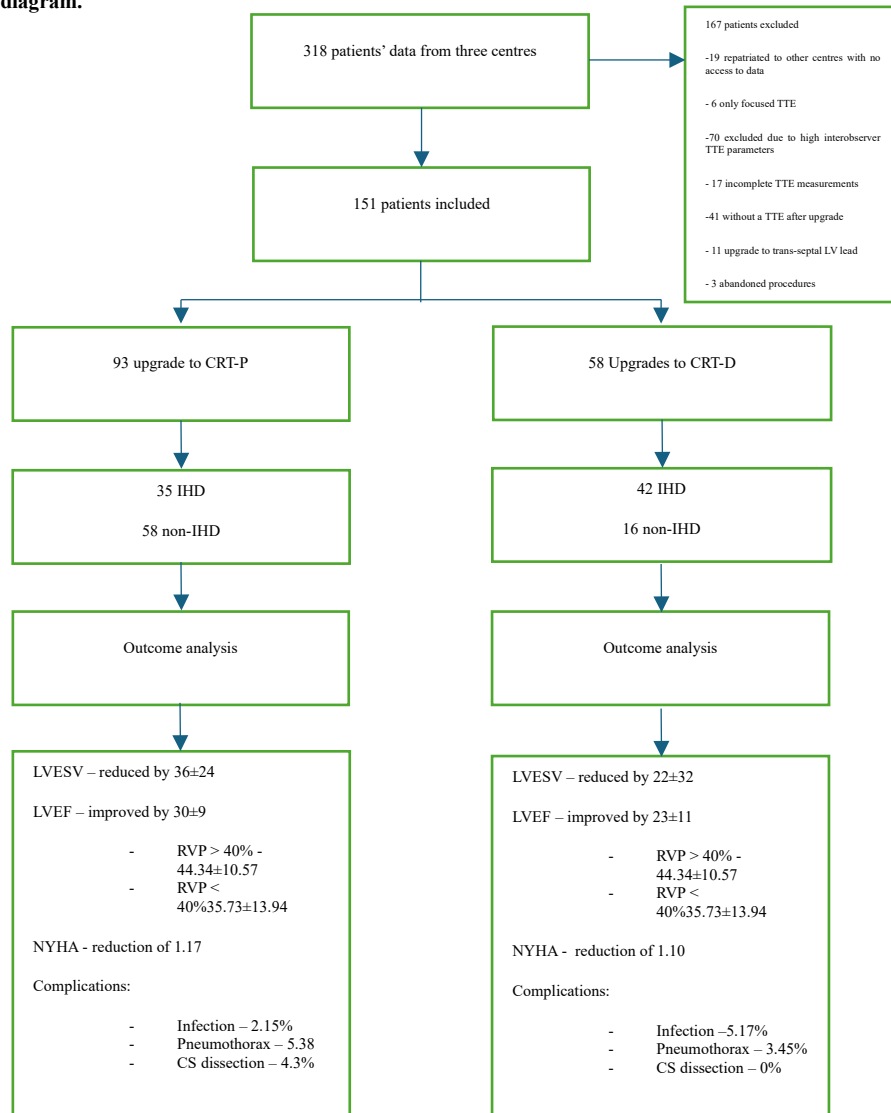

**Table S1: Baseline and post upgrade characteristics:**

| Variable                                         | Observations | Obs. without missing data | Minimum | Maximum | Mean   | Std. deviation | Variable/Test                      | Mann-Whitney       |
|--------------------------------------------------|--------------|---------------------------|---------|---------|--------|----------------|------------------------------------|--------------------|
| Pre-upgrade QRSD   ICD                           | 58           | 58                        | 123     | 221     | 170.52 | 25.46          | Pre-upgrade QRSD                   | <b>0.0073</b>      |
| Pre-upgrade QRSD   PPM Upgrade                   | 93           | 93                        | 137     | 230     | 181.56 | 21.60          |                                    |                    |
| Post upgrade QRSD   ICD                          | 58           | 58                        | 90      | 144     | 117.69 | 12.19          | Post upgrade QRSD                  | 0.3244             |
| Post upgrade QRSD   PPM Upgrade                  | 93           | 93                        | 35      | 168     | 114.88 | 15.19          |                                    |                    |
| QRSD decrease   ICD                              | 58           | 58                        | -13     | 108     | 52.83  | 25.46          | QRSD reduction                     | <b>0.0029</b>      |
| QRSD decrease   PPM Upgrade                      | 93           | 93                        | 15      | 165     | 66.68  | 25.48          |                                    |                    |
| Pre upgrade LVESV ( biplane)   ICD               | 58           | 58                        | 74      | 336     | 151.66 | 47.03          | Pre upgrade LVESV ( biplane)       | <b>&lt; 0.0001</b> |
| Pre upgrade LVESV ( biplane)   PPM Upgrade       | 93           | 93                        | 45      | 223     | 121.38 | 33.56          |                                    |                    |
| Post upgrade LVESV ( Biplane)   ICD              | 58           | 58                        | 49      | 267     | 128.98 | 58.93          | Post upgrade LVESV ( Biplane)      | <b>&lt; 0.0001</b> |
| Post upgrade LVESV ( Biplane)   PPM Upgrade      | 93           | 93                        | 35      | 193     | 84.77  | 32.44          |                                    |                    |
| LVESV decrease   ICD                             | 58           | 58                        | -70     | 125     | 22.67  | 32.33          | LVESV reduction                    | <b>0.0192</b>      |
| LVESV decrease   PPM Upgrade                     | 93           | 93                        | -11     | 118     | 36.60  | 24.69          |                                    |                    |
| Pre upgrade LVIDd ( M Mode)   ICD                | 58           | 58                        | 4.4     | 8.6     | 6.32   | 0.89           | Pre upgrade LVIDd ( M Mode)        | <b>&lt; 0.0001</b> |
| Pre upgrade LVIDd ( M Mode)   PPM Upgrade        | 93           | 93                        | 4.3     | 7.7     | 5.63   | 0.72           |                                    |                    |
| Post upgrade LVIDd (M Mode)   ICD                | 58           | 58                        | 3.9     | 8.7     | 5.94   | 1.08           | Post upgrade LVIDd (M Mode)        | <b>&lt; 0.0001</b> |
| Post upgrade LVIDd (M Mode)   PPM Upgrade        | 93           | 93                        | 3       | 7.2     | 5.10   | 0.80           |                                    |                    |
| LVIDd decrease   ICD                             | 58           | 58                        | -1.5    | 1.6     | 0.38   | 0.69           | LVIDd reduction                    | 0.1229             |
| LVIDd decrease   PPM Upgrade                     | 93           | 93                        | -0.6    | 2.05    | 0.53   | 0.47           |                                    |                    |
| Pre upgrade EF ( simpson biplane)   ICD          | 58           | 58                        | 10      | 55      | 23.88  | 11.33          | Pre upgrade EF ( simpson biplane)  | <b>&lt; 0.0001</b> |
| Pre upgrade EF ( simpson biplane)   PPM Upgrade  | 93           | 93                        | 9       | 55      | 30.52  | 9.70           |                                    |                    |
| Post upgrade EF ( Simpson biplane)   ICD         | 58           | 58                        | 10      | 62      | 33.90  | 13.56          | Post upgrade EF ( Simpson biplane) | <b>&lt; 0.0001</b> |
| Post upgrade EF ( Simpson biplane)   PPM Upgrade | 93           | 93                        | 10      | 65      | 43.32  | 11.29          |                                    |                    |
| EF increase   ICD                                | 58           | 58                        | -18     | 45      | 10.02  | 14.85          | EF increase                        | <b>0.0322</b>      |
| EF increase   PPM Upgrade                        | 93           | 93                        | -10     | 40      | 12.81  | 9.53           |                                    |                    |
| Pre upgrade NYHA Class   ICD                     | 58           | 58                        | 2       | 4       | 3.10   | 0.67           | Pre upgrade NYHA Class             | <b>0.0347</b>      |
| Pre upgrade NYHA Class   PPM Upgrade             | 93           | 93                        | 1       | 4       | 2.88   | 0.55           |                                    |                    |
| 0-18 Month post upgrade NYHA class   ICD         | 58           | 58                        | 1       | 3       | 2.00   | 0.70           | 0-18 Month post upgrade NYHA class | <b>0.0134</b>      |
| 0-18 Month post upgrade NYHA class   PPM Upgrade | 93           | 93                        | 1       | 3       | 1.71   | 0.68           |                                    |                    |
| NYHA decrease   ICD                              | 58           | 58                        | 0       | 3       | 1.10   | 1.00           | NYHA reduction                     | 0.5373             |
| NYHA decrease   PPM Upgrade                      | 93           | 93                        | -1      | 3       | 1.17   | 0.87           |                                    |                    |
| Pre upgrade LEDV ( Biplane)   ICD                | 58           | 58                        | 123     | 400     | 219.91 | 69.05          | Pre upgrade LEDV ( Biplane)        | <b>&lt; 0.0001</b> |
| Pre upgrade LEDV ( Biplane)   PPM Upgrade        | 93           | 93                        | 81      | 349     | 170.18 | 50.54          |                                    |                    |
| Post upgrade LEDV ( Biplane)   ICD               | 58           | 58                        | 66      | 421     | 187.22 | 81.37          | Post upgrade LEDV ( Biplane)       | <b>&lt; 0.0001</b> |
| Post upgrade LEDV ( Biplane)   PPM Upgrade       | 93           | 93                        | 62      | 275     | 128.95 | 46.86          |                                    |                    |
| LEDV decrease   ICD                              | 58           | 58                        | -117    | 141     | 32.70  | 56.56          | LEDV reduction                     | 0.5935             |
| LEDV decrease   PPM Upgrade                      | 93           | 93                        | -12     | 151     | 41.24  | 29.74          |                                    |                    |

Components of the study outcome:

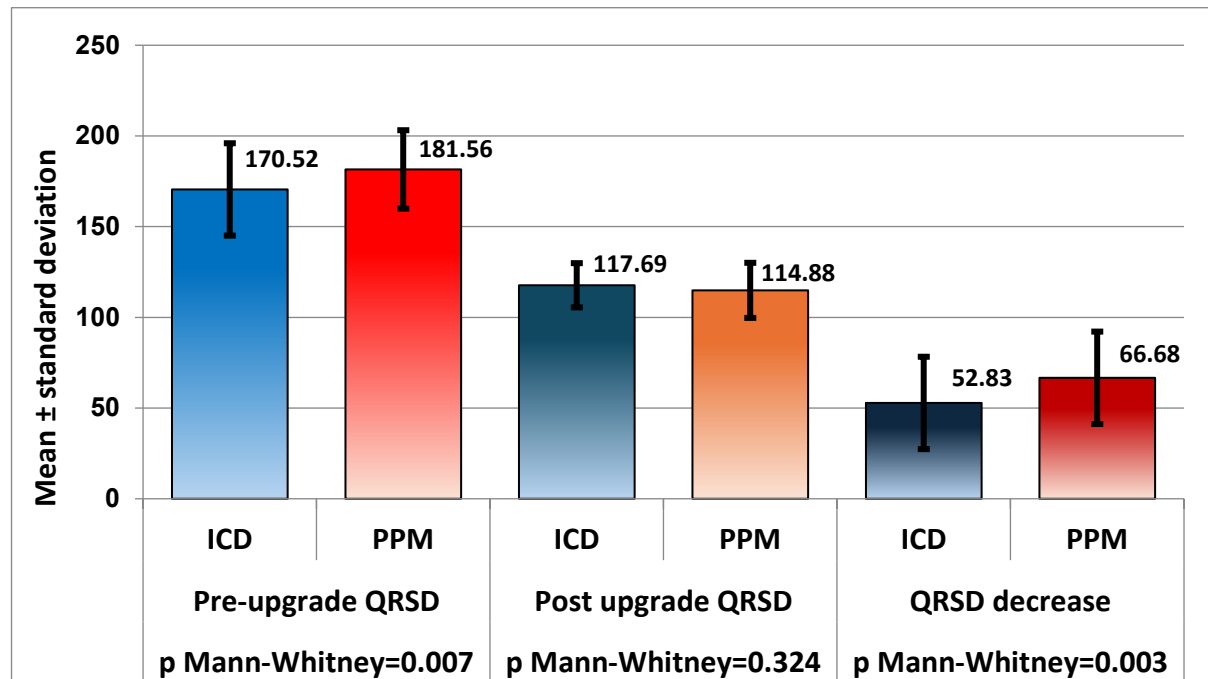

Figure S2. Patients in the PPM group had significantly greater QRS duration compared to ICD group pre-upgrade to CRT (p Mann Whitney=0.007 < 0,05). Post upgrade reduction in QRS duration was statistically significant within the PPM group (p=0.003<0.05).

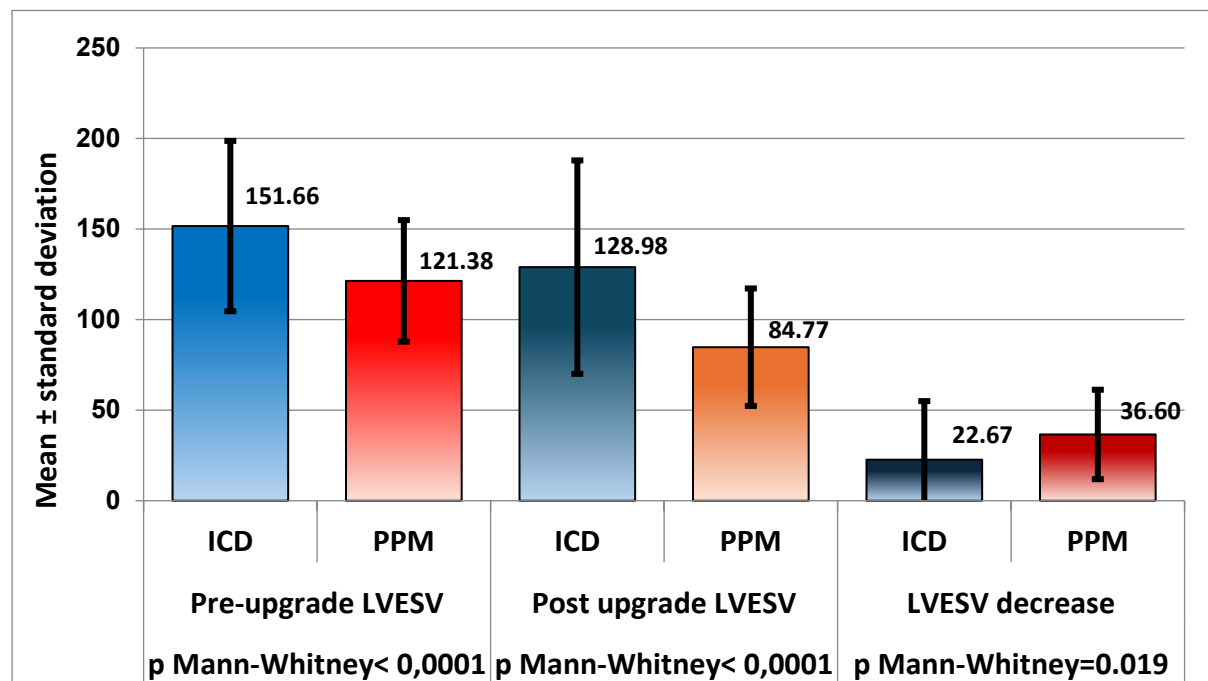

Figure S3: Comparing LVESV, there were highly significant differences between the pre- and post-upgrade volumes measured in the ICD and PPM patients, in both situations ICD patients having greater values. Comparing the reduction in LVESV, we noticed a significant reduction of LVESV within the PPM group compared to the ICD group(p Mann-Whitney=0.019<0.05).

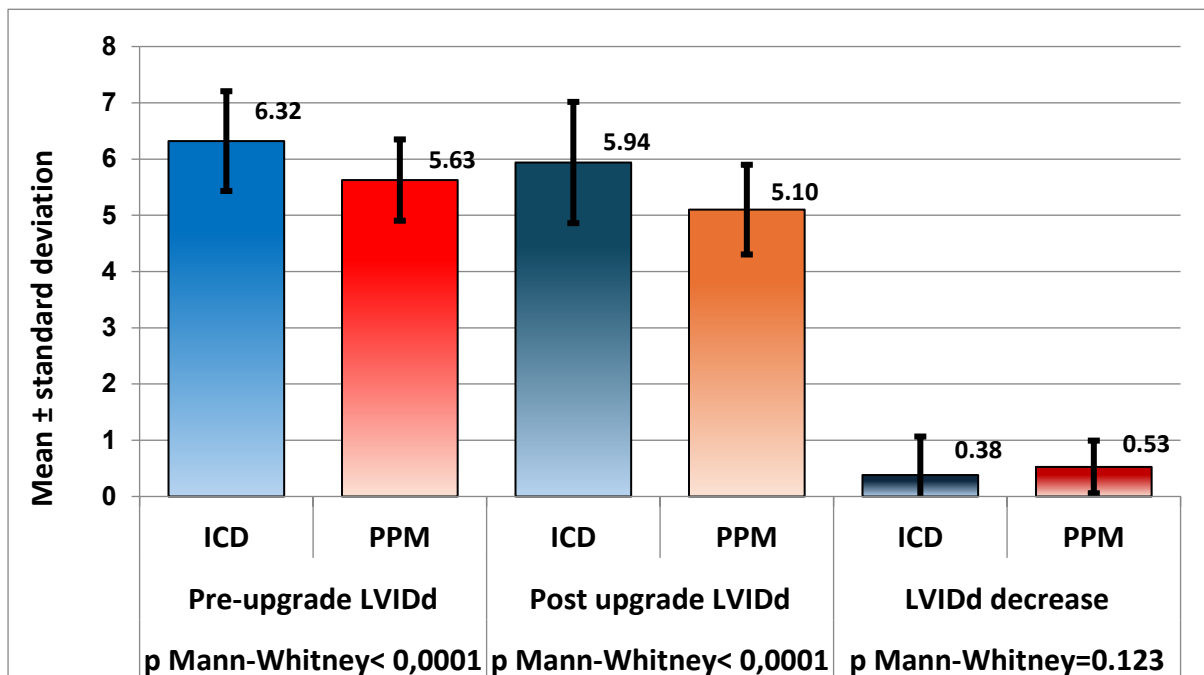

Figure S4: The ICD group had a greater LVIDd both, pre-and post-upgrade however, the post-upgrade reduction in LVIDd was not statistically significant comparing the two groups ( $p=0.123>0.05$ ).

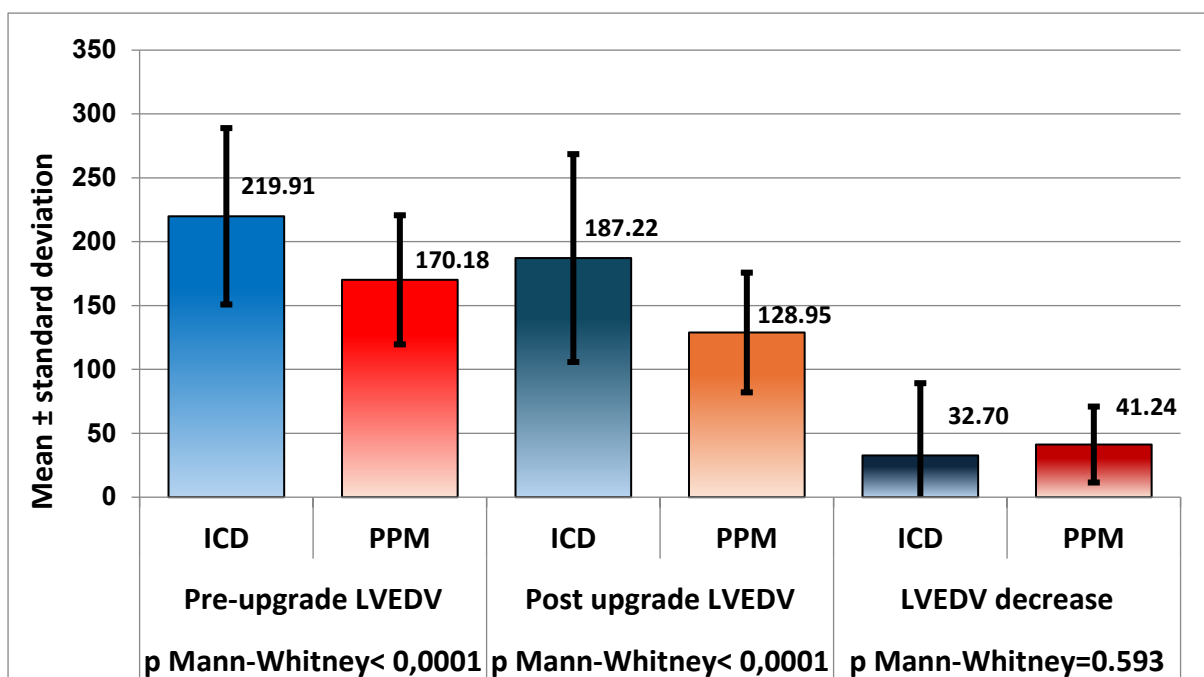

Figure S5: LVEDV was significantly greater in patients with ICD, both pre- and post-upgrade ( $p<0.001$ ). Post upgrade, the PPM group had a greater reduction, however statistically not significant when compared to the ICD group ( $p$  Mann-Whitney  $p=0.593$ ).

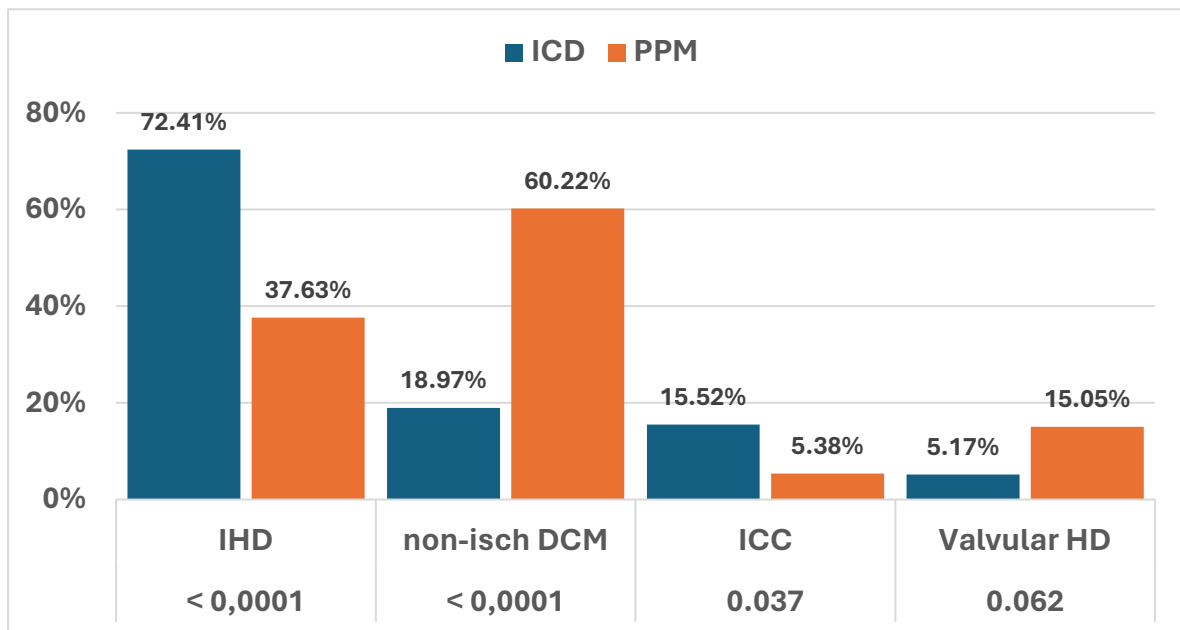

Figure S6: High prevalence of IHD in the ICD group (p Chi square<0,001). High prevalence of non-ischemic DCM in PPM patients.

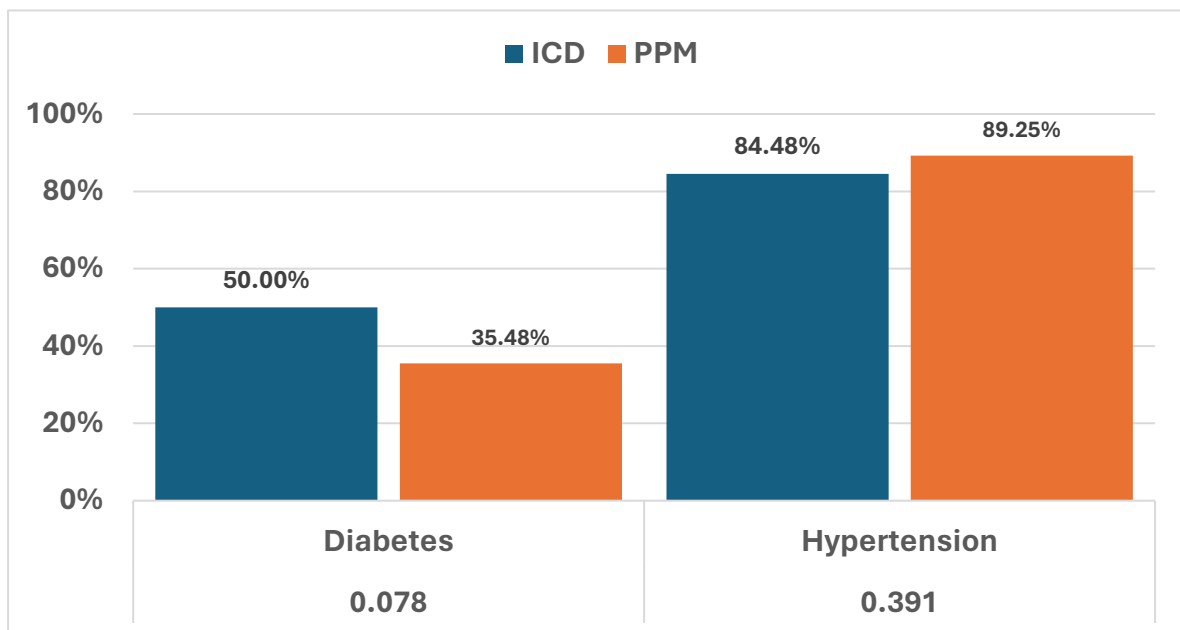

Figure S7: Patients within the ICD group had an increased prevalence of diabetes compared to the PPM group; however, the difference was not statistically significant (p Chi square=0.078>0.05). Hypertension prevalence rates were similar in the two subgroups.

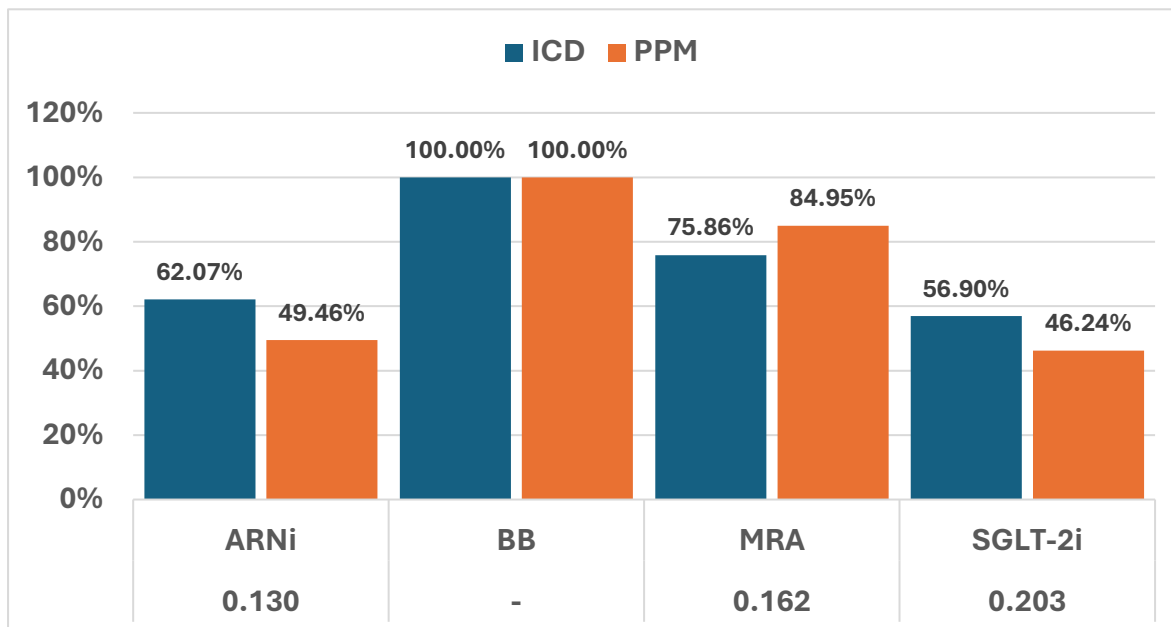

Figure S8: There were no significant differences in the use of the four pillars of heart failure treatment<sup>28</sup> between the ICD and PPM groups.

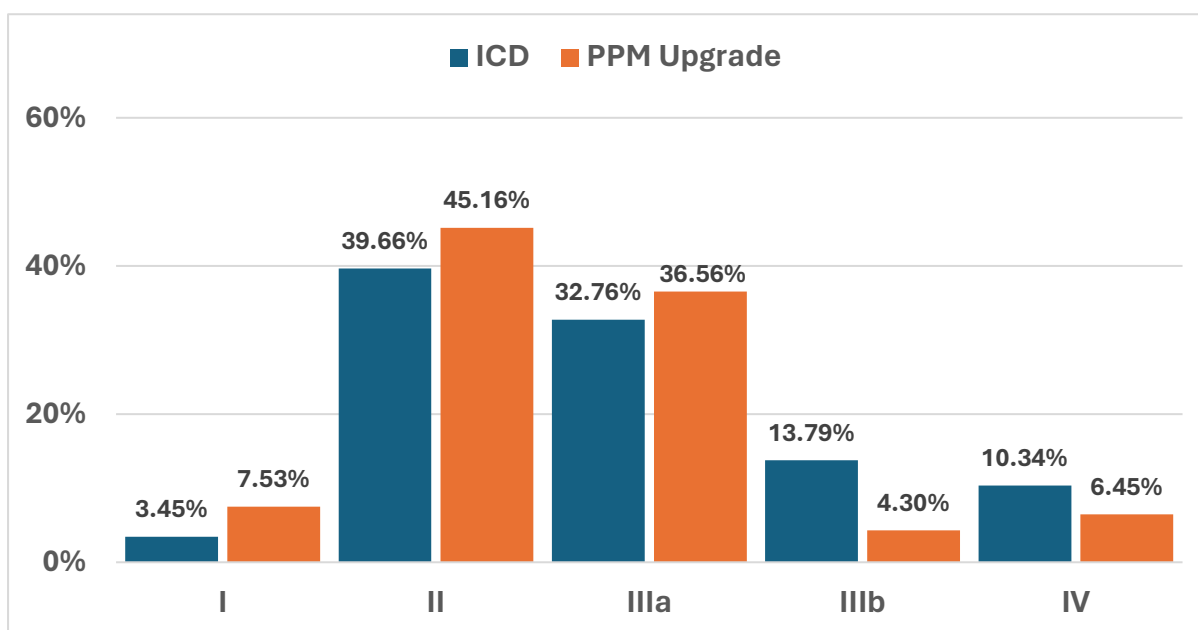

Figure S9: The prevalence of chronic kidney disease within the two subgroups were non-significant (p Chi square=0.189>0.05).
